# Supplementary material
Source: HighWire-hosted journal article supplement (https://erj.ersjournals.com/content/58/3/2101739)
Supplement: inline-supplementary-material-1 [file inline-supplementary-material-1.pdf]

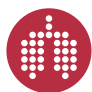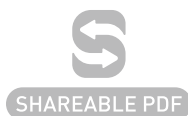

# The role of cigarette smoking-derived pollutants in the risk of mortality in idiopathic pulmonary fibrosis

Hee-Young Yoon<sup>1</sup>, Sun-Young Kim<sup>2</sup>, Ok-Jin Kim<sup>2</sup> and Jin Woo Song <sup>1</sup>

<sup>1</sup>Dept of Pulmonary and Critical Care Medicine, Asan Medical Center, University of Ulsan College of Medicine, Seoul, Republic of Korea. <sup>2</sup>Dept of Cancer Control and Population Health, Graduate School of Cancer Science and Policy, National Cancer Center, Gyeonggi, Republic of Korea.

Jin Woo Song ([jwsongasan@gmail.com](mailto:jwsongasan@gmail.com))

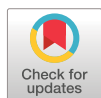

Shareable abstract (@ERSpublications)

**The effect of air pollutants on mortality risk in patients with IPF is independent of their smoking status** <https://bit.ly/3rLUAvA>

**Cite this article as:** Yoon H-Y, Kim S-Y, Kim O-J, *et al.* The role of cigarette smoking-derived pollutants in the risk of mortality in idiopathic pulmonary fibrosis. *Eur Respir J* 2021; 58: 2101739 [DOI: 10.1183/13993003.01739-2021].

This single-page version can be shared freely online.

Copyright ©The authors 2021. For reproduction rights and permissions contact [permissions@ersnet.org](mailto:permissions@ersnet.org)

Received: 19 June 2021  
Accepted: 20 July 2021

*Reply to T. Yasuma and co-workers:*
